# Supplementary material for: The image quality and diagnostic accuracy of T1-mapping-based synthetic late gadolinium enhancement imaging: comparison with conventional late gadolinium enhancement imaging in real-life clinical situation
Source: PubMed Central journal article supplement (PMC9008937; doi:10.1186/s12968-022-00857-1), 2022-04-14
Supplement: 12968_2022_857_MOESM1_ESM.pdf [file 12968_2022_857_MOESM1_ESM.pdf]

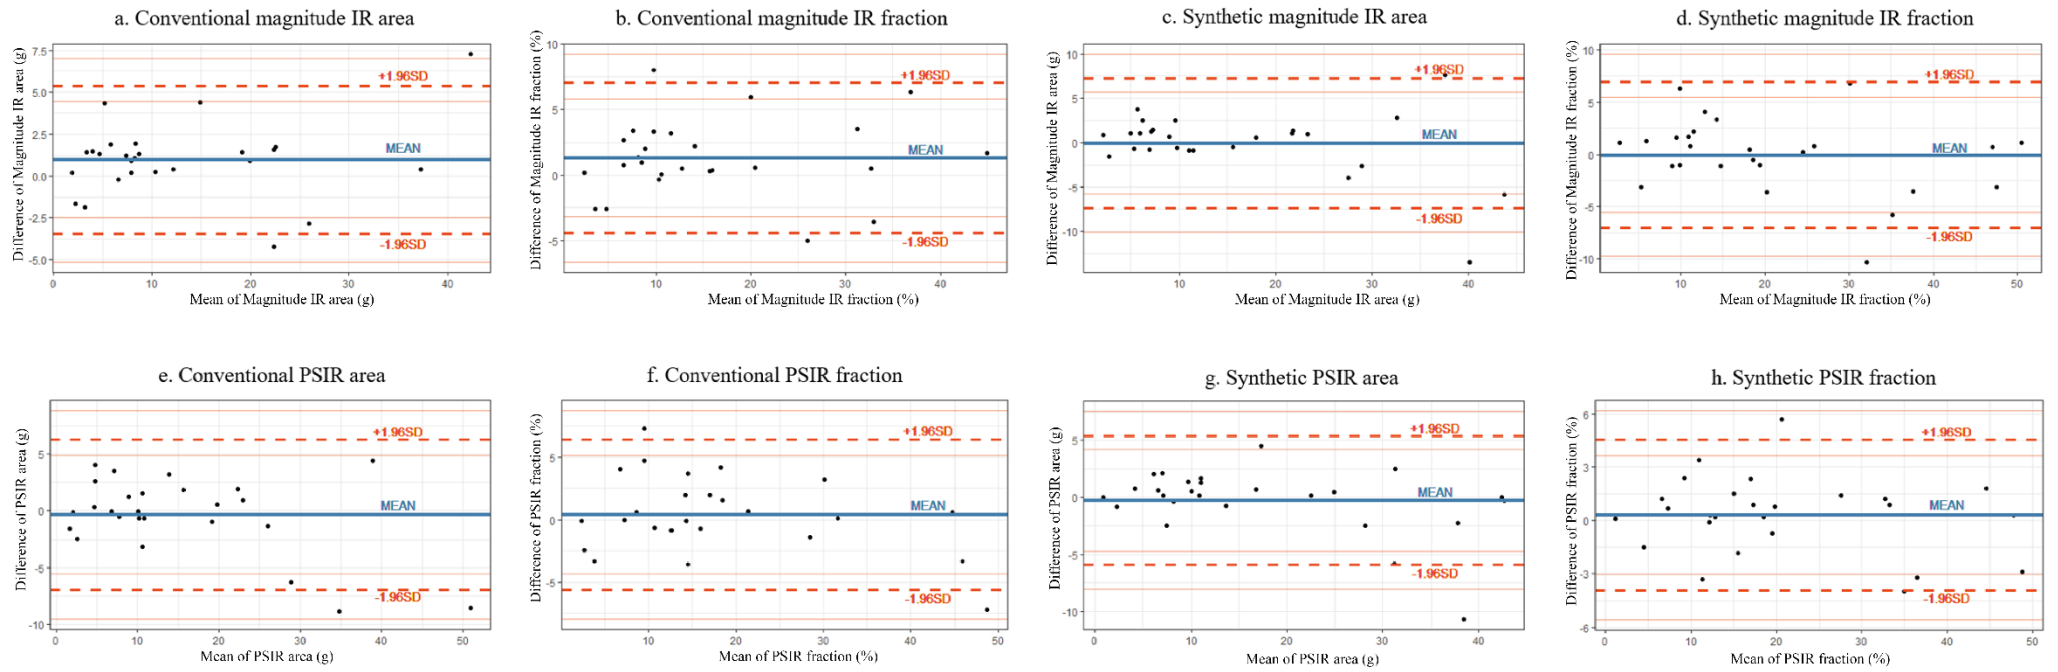

**Figure S1:** Bland-Altman plots for the inter-reader agreement of quantified area and percentage of myocardium in LGE-positive ischemic and hypertrophic cardiomyopathy subgroups. There was a small systematic difference between the two readers.

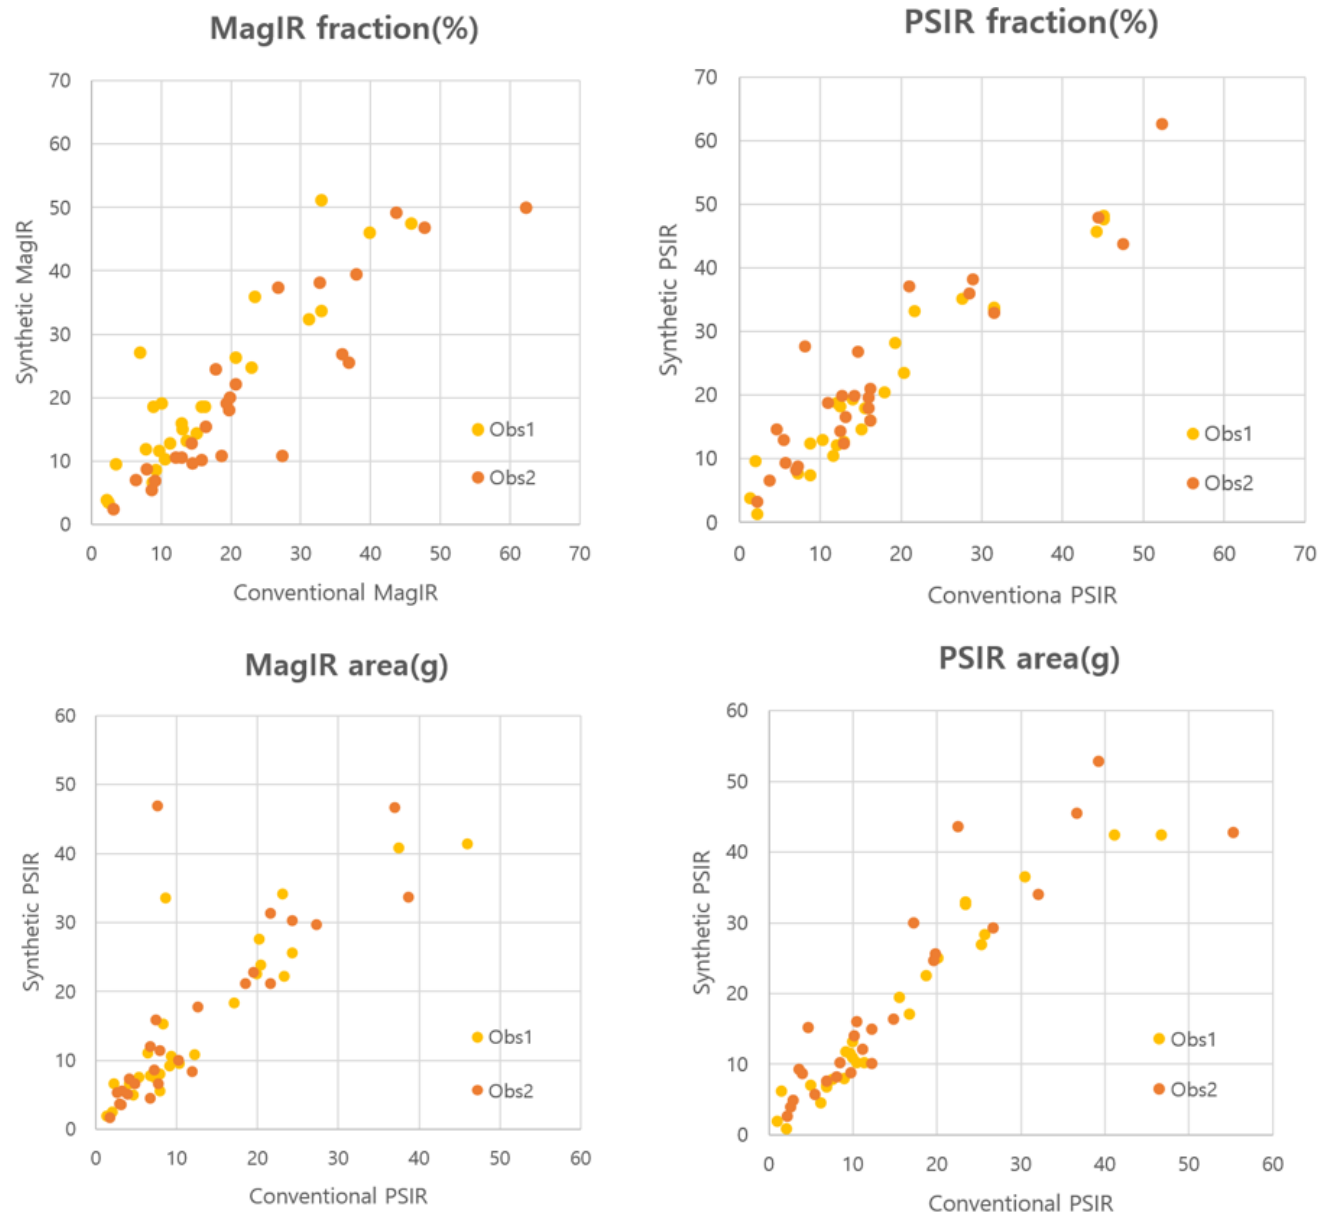

**Figure S2.** Distribution of quantified LGE fraction and area between conventional and synthetic magnitude IR and PSIR images.

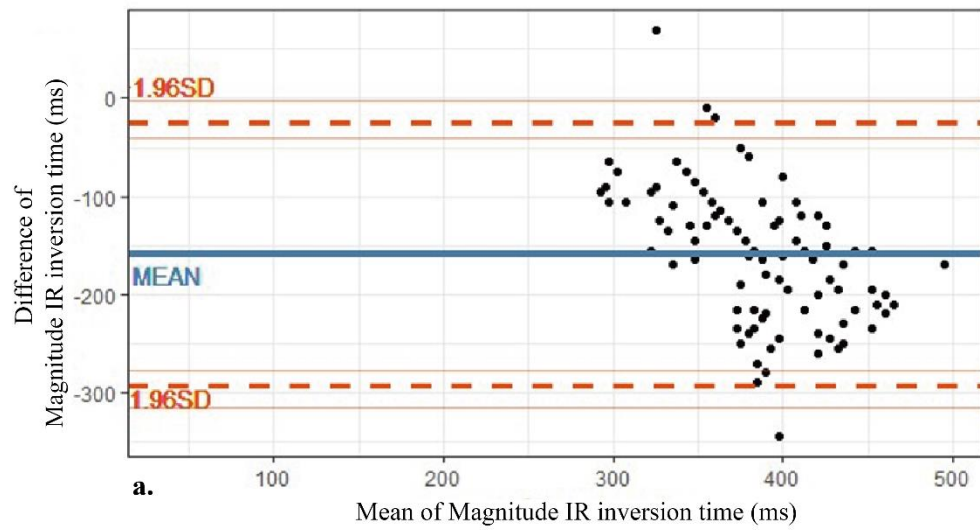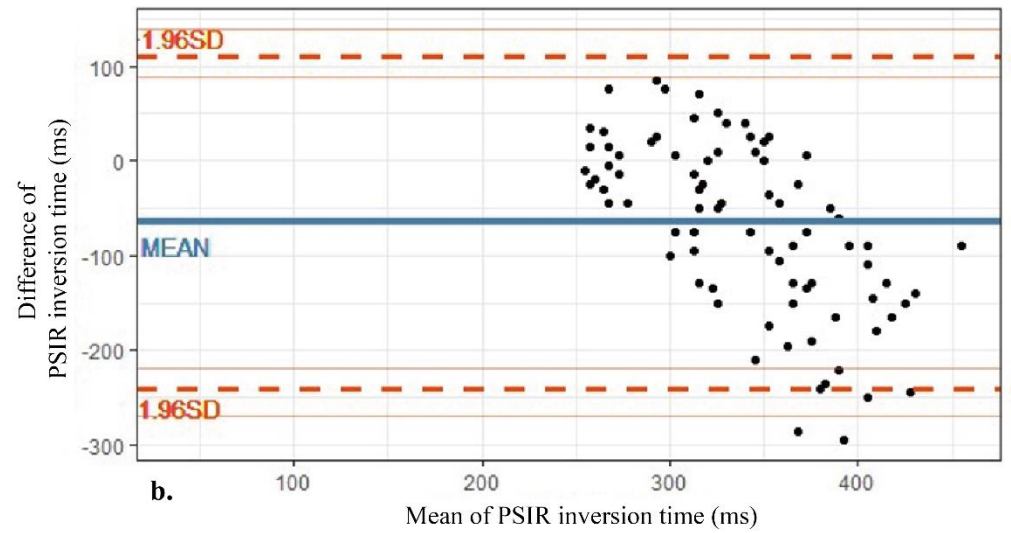

**Figure S3.** Bland-Altman plots for the inversion time (TI) between conventional and synthetic LGE images in (a) Magnitude IR and (b) PSIR images.

200ms

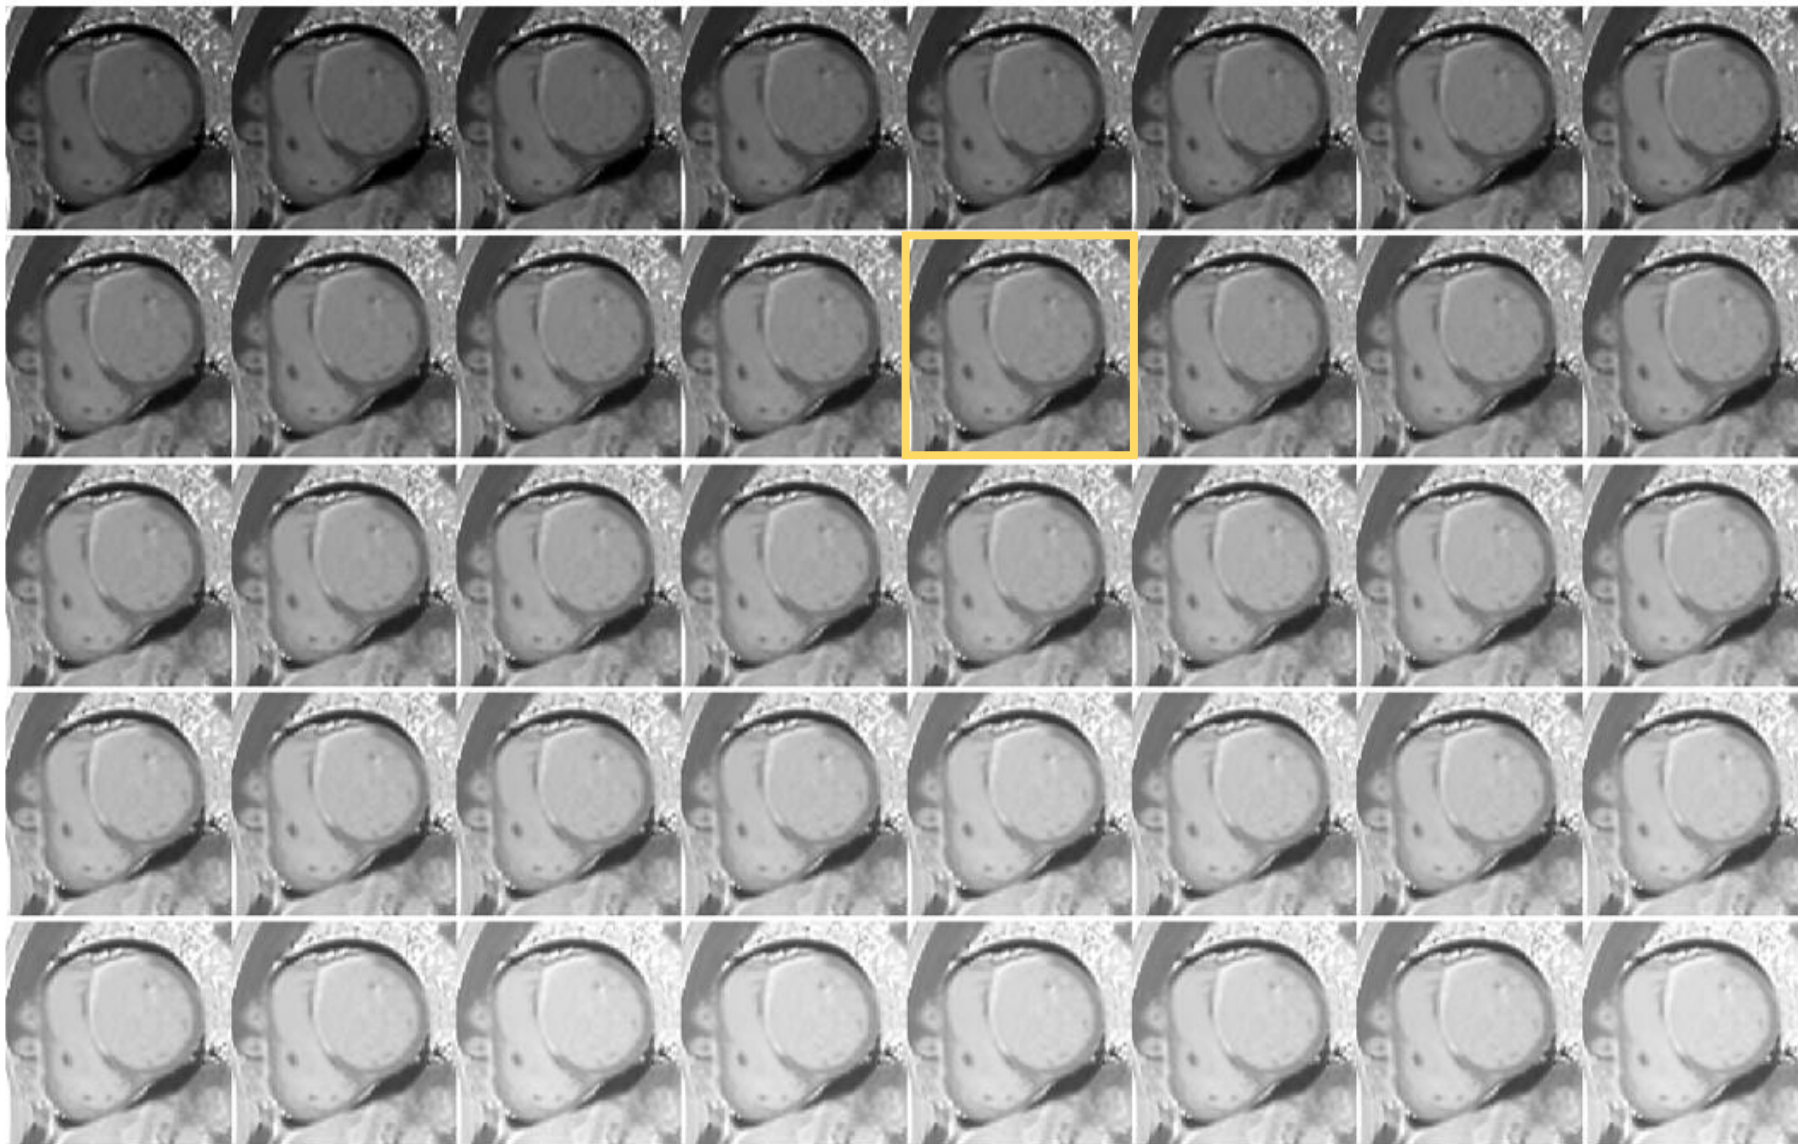

600ms

**Figure S4.** Reconstructed synthetic LGE PSIR images between inversion times of 200 and 600 msec with 10 msec increments. The selected image for myocardial evaluation was TI of 340ms (yellow box).
